# Supplementary material for: Validation of the International HIV Dementia Scale as a Screening Tool for HIV-Associated Neurocognitive Disorders in a German-Speaking HIV Outpatient Clinic
Source: PubMed Central journal article supplement (PMC5167352; doi:10.1371/journal.pone.0168225), 2016-12-19
Supplement: pone.0168225.s001.pdf [file pone.0168225.s001.pdf]

## ADDITIONAL MATERIAL

### Questionnaire of the DNAA – Page 1

#### SNAS – Short Neuro-AIDS Screening - German NeuroAIDS Study Group

DNAA Deutsche Neuro-AIDS Arbeitsgemeinschaft e.V.,

<http://www.dnaa.de>

#### NeuroScreening

für Neurokognitive Defizite in HIV+ Patienten

|                                                                                                                                 |                                                                                                                            |               |
|---------------------------------------------------------------------------------------------------------------------------------|----------------------------------------------------------------------------------------------------------------------------|---------------|
| <b>Patientennummer:</b>                                                                                                         | <b>Geschlecht:</b> <input type="checkbox"/> M <input type="checkbox"/> F                                                   | <b>Alter:</b> |
| <i>Können Sie seit mehr als 3 Monaten nicht mehr konzentriert den gewohnten Arbeiten und Freizeit-Tätigkeiten nachgehen?</i>    | <i>Fällt Ihnen mehrmals am Tag ein Gegenstand aus der Hand?</i>                                                            |               |
| <input type="checkbox"/> Ja <input type="checkbox"/> Nein                                                                       | <input type="checkbox"/> Ja <input type="checkbox"/> Nein                                                                  |               |
| <i>Müssen Sie die Seiten eines Buches oder einer Zeitung mehrfach lesen, um den Inhalt zu behalten?</i>                         | <i>Sind Sie seit mehr als 3 Monaten depressiv gestimmt, ohne dass große Veränderungen in Ihrem Leben aufgetreten sind?</i> |               |
| <input type="checkbox"/> Ja <input type="checkbox"/> Nein                                                                       | <input type="checkbox"/> Ja <input type="checkbox"/> Nein                                                                  |               |
| <i>Hat sich Ihr Schriftbild verändert?</i>                                                                                      | <i>Sind Sie tagsüber ständig müde, obwohl Sie nachts schlafen?</i>                                                         |               |
| <input type="checkbox"/> Ja <input type="checkbox"/> Nein                                                                       | <input type="checkbox"/> Ja <input type="checkbox"/> Nein                                                                  |               |
| <i>Können Sie kleine Schrauben nicht mehr andrehen, keine Knöpfe mehr annähen oder sind Sie am Computer langsamer geworden?</i> | <i>Haben Sie mehr als 3 Monate andauernde Ein- und/oder Durchschlafstörungen?</i>                                          |               |
| <input type="checkbox"/> Ja <input type="checkbox"/> Nein                                                                       | <input type="checkbox"/> Ja <input type="checkbox"/> Nein                                                                  |               |

|                                                                                                                                                                              | Ja                     | Nein                          |
|------------------------------------------------------------------------------------------------------------------------------------------------------------------------------|------------------------|-------------------------------|
| <i>Spricht Ihr persönliches Umfeld Sie darauf an, dass Sie sich verändert haben?</i>                                                                                         |                        |                               |
| <i>Waren Sie in den letzten 12 Monaten mehrfach krankgeschrieben, ohne dass eine internistische/allgemeinmedizinische Erkrankung zugrunde lag (allgemeiner Erschöpfung)?</i> |                        |                               |
| <i>Sind Sie älter als 65 Jahre?</i>                                                                                                                                          |                        |                               |
| <i>Sind Sie bereits seit dem Kindes-/Jugendalter mit HIV infiziert?</i>                                                                                                      |                        |                               |
| <i>Befinden Sie sich zur Zeit in einer Therapiepause?</i>                                                                                                                    |                        |                               |
| <i>Haben Sie eine antiretrovirale Therapie bei einer geringen CD4-Zellzahl (&lt;250Zellen/ml) begonnen?</i>                                                                  |                        |                               |
| <i>Gibt es eine nachweisbare Viruslast trotz der Therapie?</i>                                                                                                               |                        |                               |
| <i>Verspüren Sie ungewöhnliche Kribbel-/Wärme-/Kältegefühle, Schmerzen oder Taubheit in den Händen und Füßen?</i>                                                            |                        |                               |
| <i>Stolpern Sie häufig?</i>                                                                                                                                                  |                        |                               |
| <i>Bemerken Sie einen Rückgang der Muskulatur, nicht gut heilende Wunden oder Verfärbungen der Haut an den Füßen und Unterschenkeln?</i>                                     |                        |                               |
| <i>Haben Sie Potenz- bzw. Libidostörungen?</i>                                                                                                                               |                        |                               |
| <i>Bemerken Sie Störungen beim Wasserlassen?</i>                                                                                                                             |                        |                               |
| <i>Haben Sie Videx, Zerit oder Tuberkulosemittel in den letzten 12 Monaten genommen?</i>                                                                                     |                        |                               |
| <i>Leiden Sie unter Diabetes mellitus (Zuckerkrankheit)?</i>                                                                                                                 |                        |                               |
| <i>HCV/HBV Serologien</i>                                                                                                                                                    | <i>Vorerkrankungen</i> | <i>Alkoholkonsum</i>          |
|                                                                                                                                                                              |                        | <i>Konsum tox. Substanzen</i> |

Note: The design and content have been adapted to the needs of our study.

**Questionnaire of the DNAA – Page 2**

**SNAS – Short Neuro-AIDS Screening - German NeuroAIDS Study Group**

DNAA Deutsche Neuro-AIDS Arbeitsgemeinschaft e.V.,

<http://www.dnaa.de>

**Behandler Teil**

|                |                             |
|----------------|-----------------------------|
| <i>HIV ED:</i> | <i>Infektionszeitpunkt:</i> |
|----------------|-----------------------------|

*Aktuelle ART:*

| <i>Kommentare</i>    |
|----------------------|
| <i>Konzentration</i> |
| <i>Gedächtnis</i>    |
| <i>Feinmotorik</i>   |
| <i>Stimmung</i>      |
| <i>Schlaf</i>        |
| <i>PNP</i>           |

| <i>International HIV Dementia Scale – IHDS</i>                                                                                                                               |                   | <i>Laborwerte</i>           |  |
|------------------------------------------------------------------------------------------------------------------------------------------------------------------------------|-------------------|-----------------------------|--|
| <i>MS</i>                                                                                                                                                                    |                   | <i>Viruslast-PCR</i>        |  |
| <i>PMS</i>                                                                                                                                                                   |                   | <i>T-Helferzellen abs</i>   |  |
| <i>MR</i>                                                                                                                                                                    |                   | <i>T-Helferzellen rel</i>   |  |
| <b><i>Punktzahl</i></b>                                                                                                                                                      | <b><i>/12</i></b> | <i>Ratio CD4/CD8</i>        |  |
| <input type="checkbox"/> <i>Unauffällig</i><br><input type="checkbox"/> <i>Grenzwertig</i><br><input type="checkbox"/> <i>Auffällig, eine Weiteretestung wird empfohlen.</i> |                   | <i>Viruslast Zenit</i>      |  |
|                                                                                                                                                                              |                   | <i>T-Helferzellen Nadir</i> |  |
|                                                                                                                                                                              |                   | <i>TPPA / VDRL</i>          |  |

*Note: The design and content have been adapted to the needs of our study.*
