# Supplementary material for: Validation of the International HIV Dementia Scale as a Screening Tool for HIV-Associated Neurocognitive Disorders in a German-Speaking HIV Outpatient Clinic
Source: PubMed Central journal article supplement (PMC5167352; doi:10.1371/journal.pone.0168225), 2016-12-19
Supplement: pone.0168225.s003.pdf [file pone.0168225.s003.pdf]

**PONE-D-16-07464**

*“Validation of the International HIV Dementia Scale as a screening tool for HIV-Associated Neurocognitive Disorders in a German-speaking HIV outpatient clinic”*

| Normative conversion of raw IHDS total scores to Scaled Scores |              |
|----------------------------------------------------------------|--------------|
| Raw Score                                                      | Scaled Score |
| ≤6                                                             | 1            |
| 6.5                                                            | 2            |
| 7                                                              | 3            |
| 7.5                                                            | 4            |
| 8                                                              | 5            |
| 9                                                              | 6            |
| 9.5                                                            | 7            |
| 10                                                             | 8            |
| 10.5                                                           | 9            |
| 11                                                             | 10           |
| 11.5                                                           | 11           |
| 12                                                             | 12           |

**PONE-D-16-07464**

*“Validation of the International HIV Dementia Scale as a screening tool for HIV-Associated Neurocognitive Disorders in a German-speaking HIV outpatient clinic”*

**Demographically-adjusted normative standards (T-scores, M=50; SD=10)**

| SS | Education 8 -12 Years |       |       |       |       |       |       |       |       |    |
|----|-----------------------|-------|-------|-------|-------|-------|-------|-------|-------|----|
|    | Age                   |       |       |       |       |       |       |       |       |    |
|    | 21-25                 | 26-30 | 31-35 | 36-40 | 41-45 | 46-50 | 51-55 | 56-60 | 61-65 |    |
| 1  |                       | 0     | 0     | 0     | 0     | 0     | 1     | 2     | 3     | 4  |
| 2  |                       | 0     | 2     | 3     | 4     | 5     | 6     | 7     | 8     | 9  |
| 3  |                       | 5     | 6     | 7     | 8     | 10    | 11    | 12    | 13    | 14 |
| 4  |                       | 10    | 11    | 12    | 13    | 14    | 15    | 16    | 18    | 19 |
| 5  |                       | 15    | 16    | 17    | 18    | 19    | 20    | 21    | 22    | 23 |
| 6  |                       | 20    | 21    | 22    | 23    | 24    | 25    | 26    | 27    | 28 |
| 7  |                       | 24    | 25    | 26    | 28    | 29    | 30    | 31    | 32    | 33 |
| 8  |                       | 29    | 30    | 31    | 32    | 33    | 34    | 35    | 37    | 38 |
| 9  |                       | 34    | 35    | 36    | 37    | 38    | 39    | 40    | 41    | 42 |
| 10 |                       | 39    | 40    | 41    | 42    | 43    | 44    | 45    | 46    | 47 |
| 11 |                       | 43    | 44    | 45    | 47    | 48    | 49    | 50    | 51    | 52 |
| 12 |                       | 48    | 49    | 50    | 51    | 52    | 53    | 55    | 56    | 57 |

**PONE-D-16-07464**

*“Validation of the International HIV Dementia Scale as a screening tool for HIV-Associated Neurocognitive Disorders in a German-speaking HIV outpatient clinic”*

**Demographically-adjusted normative standards (T-scores, M=50; SD=10)**

| SS | Education 13 - 15 Years |       |       |       |       |       |       |       |       |   |
|----|-------------------------|-------|-------|-------|-------|-------|-------|-------|-------|---|
|    | Age                     |       |       |       |       |       |       |       |       |   |
|    | 21-25                   | 26-30 | 31-35 | 36-40 | 41-45 | 46-50 | 51-55 | 56-60 | 61-65 |   |
| 1  | 0                       | 0     | 0     | 0     | 0     | 0     | 0     | 0     | 1     | 2 |
| 2  | 0                       | 0     | 0     | 1     | 2     | 3     | 4     | 6     | 7     |   |
| 3  | 2                       | 3     | 5     | 6     | 7     | 8     | 9     | 10    | 12    |   |
| 4  | 7                       | 8     | 9     | 10    | 12    | 13    | 14    | 15    | 16    |   |
| 5  | 12                      | 13    | 14    | 15    | 16    | 18    | 19    | 20    | 21    |   |
| 6  | 17                      | 18    | 19    | 20    | 21    | 22    | 24    | 25    | 26    |   |
| 7  | 21                      | 22    | 24    | 25    | 26    | 27    | 28    | 29    | 31    |   |
| 8  | 26                      | 27    | 28    | 30    | 31    | 32    | 33    | 34    | 35    |   |
| 9  | 31                      | 32    | 33    | 34    | 35    | 37    | 38    | 39    | 40    |   |
| 10 | 36                      | 37    | 38    | 39    | 40    | 41    | 43    | 44    | 45    |   |
| 11 | 40                      | 41    | 43    | 44    | 45    | 46    | 47    | 48    | 50    |   |
| 12 | 45                      | 46    | 47    | 49    | 50    | 51    | 52    | 53    | 54    |   |

**PONE-D-16-07464**

*“Validation of the International HIV Dementia Scale as a screening tool for HIV-Associated Neurocognitive Disorders in a German-speaking HIV outpatient clinic”*

**Demographically-adjusted normative standards (T-scores, M=50; SD=10)**

| SS | Education 15 - 20 Years |       |       |       |       |       |       |       |       |    |
|----|-------------------------|-------|-------|-------|-------|-------|-------|-------|-------|----|
|    | Age                     |       |       |       |       |       |       |       |       |    |
|    | 21-25                   | 26-30 | 31-35 | 36-40 | 41-45 | 46-50 | 51-55 | 56-60 | 61-65 |    |
| 1  |                         | 0     | 0     | 0     | 0     | 0     | 0     | 0     | 1     | 1  |
| 2  |                         | 0     | 0     | 0     | 0     | 0     | 1     | 2     | 3     | 5  |
| 3  |                         | 0     | 0     | 2     | 3     | 4     | 6     | 7     | 8     | 9  |
| 4  |                         | 4     | 5     | 6     | 8     | 9     | 10    | 12    | 13    | 14 |
| 5  |                         | 9     | 10    | 11    | 13    | 14    | 15    | 16    | 18    | 19 |
| 6  |                         | 13    | 15    | 16    | 17    | 19    | 20    | 21    | 22    | 24 |
| 7  |                         | 18    | 20    | 21    | 22    | 23    | 25    | 26    | 27    | 28 |
| 8  |                         | 23    | 24    | 26    | 27    | 28    | 29    | 31    | 32    | 33 |
| 9  |                         | 28    | 29    | 30    | 32    | 33    | 34    | 35    | 37    | 38 |
| 10 |                         | 33    | 34    | 35    | 36    | 38    | 39    | 40    | 41    | 43 |
| 11 |                         | 37    | 39    | 40    | 41    | 42    | 44    | 45    | 46    | 47 |
| 12 |                         | 42    | 43    | 45    | 46    | 47    | 48    | 50    | 51    | 52 |
